# Supplementary material for: Rapid Genome Assembly and Comparison Decode Intrastrain Variation in Human Alphaherpesviruses
Source: PubMed Central journal article supplement — mBio. 2015 Mar 31;6(2):e02213-14. doi: 10.1128/mBio.02213-14 (PMC4453532; doi:10.1128/mbio.02213-14), 2015-03-31
Supplement: mbo002152248sf2.pdf [file mbo002152248sf2.pdf]

**Supplemental Figure S2. RFLP analysis of HSV-1 KOS and F sub-clones confirms draft genomes but obscures syncytial differences.**

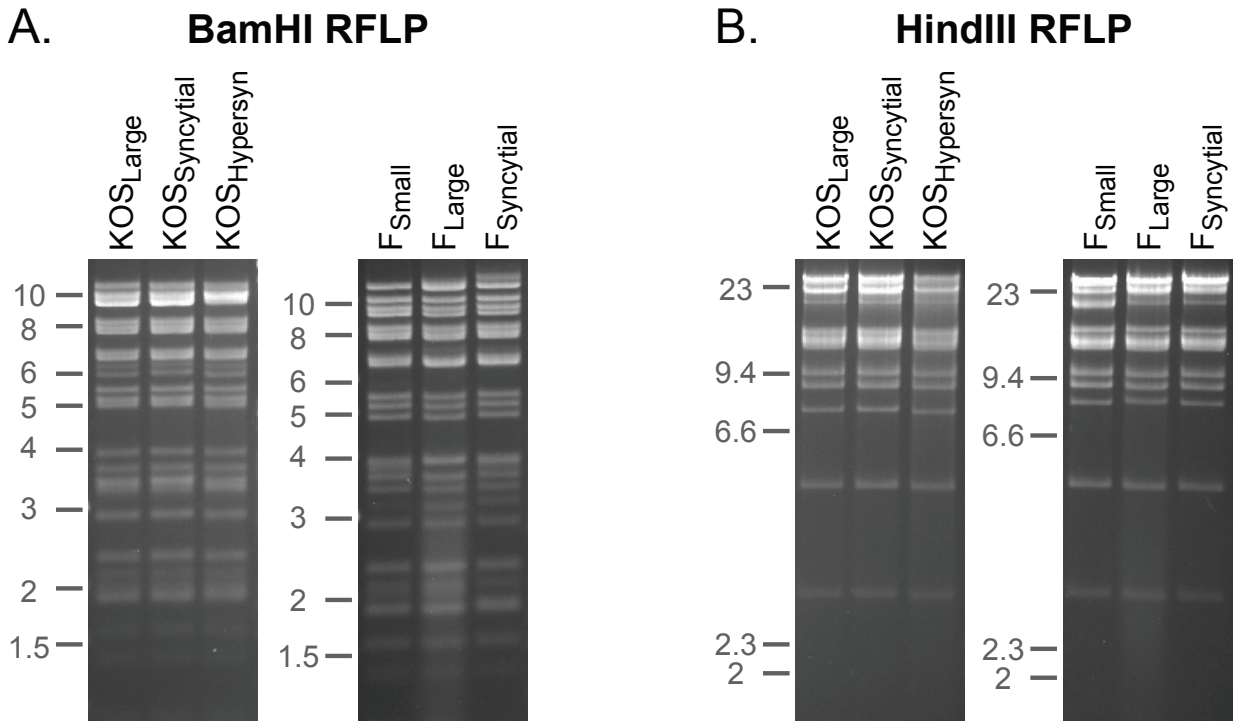

**Supplemental Figure S2. RFLP analysis of HSV-1 KOS and F sub-clones confirms draft genomes but obscures syncytial differences.** Restriction fragment length polymorphism analysis (RFLP) revealed no major differences in digest patterns, for sub-clones of a given strain. (A) BamHI and (B) HindIII RFLPs were analyzed for sub-clones of HSV-1 KOS and F described in Figure 1. Marker lanes (size in kb) are shown to the left of each gel.
