# Supplementary material for: Rapid Genome Assembly and Comparison Decode Intrastrain Variation in Human Alphaherpesviruses
Source: PubMed Central journal article supplement — mBio. 2015 Mar 31;6(2):e02213-14. doi: 10.1128/mBio.02213-14 (PMC4453532; doi:10.1128/mbio.02213-14), 2015-03-31
Supplement: mbo002152248sf3.pdf [file mbo002152248sf3.pdf]

**Supplemental Figure S3. Overview of HSV genome sequencing using the Viral Genome Assembly (VirGA) workflow.**

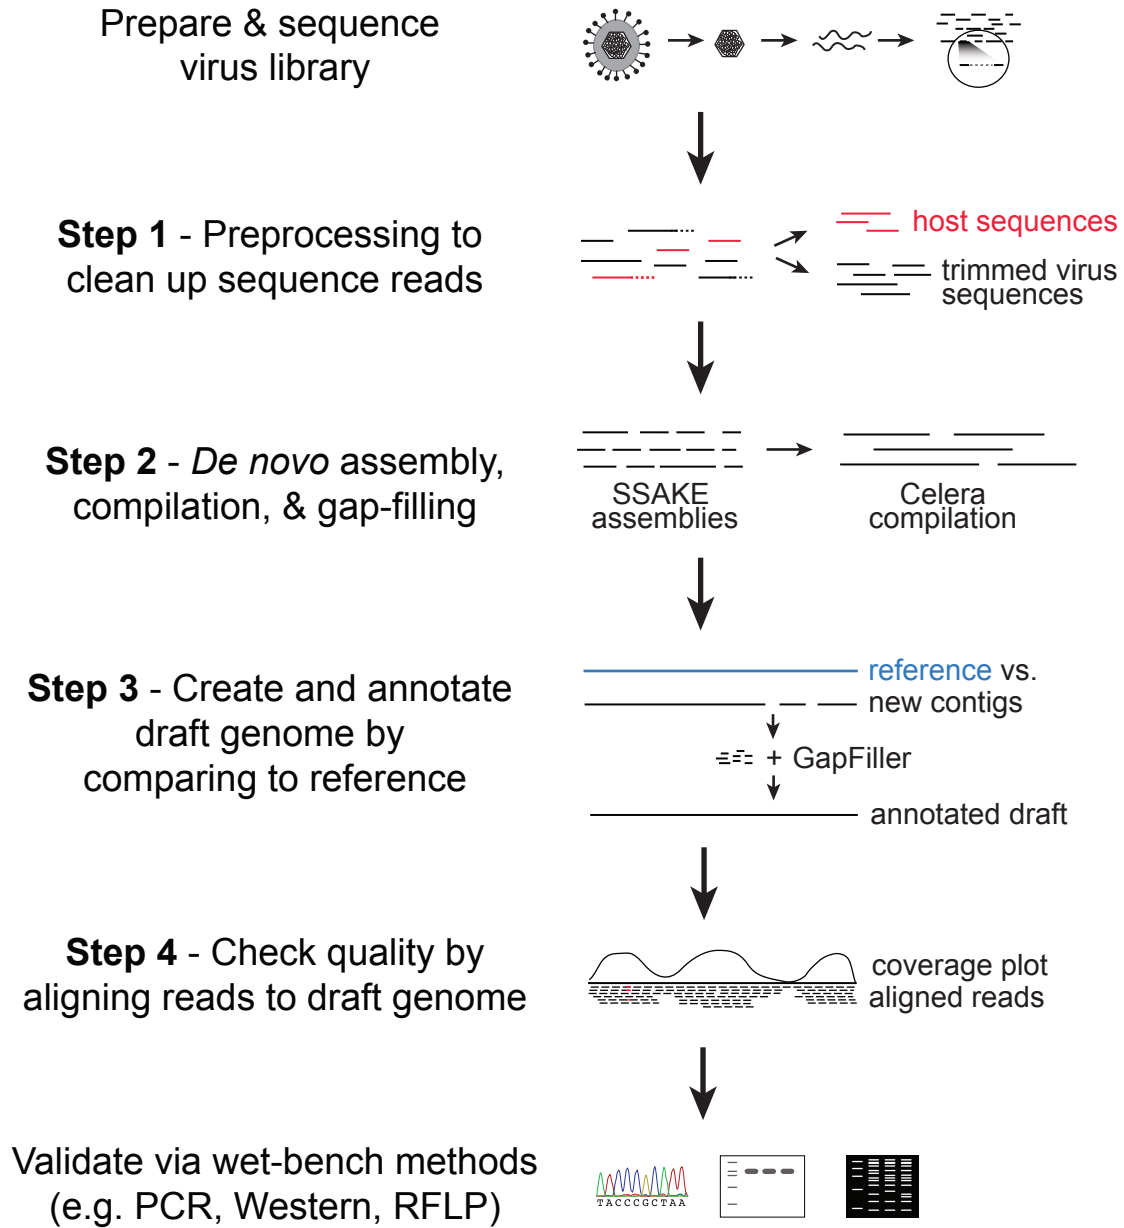

**Supplemental Figure S3. Overview of HSV genome sequencing using the Viral Genome Assembly (VirGA) workflow.** The VirGA workflow requires an input of high-throughput Illumina sequence read data from the viral genome of interest. We generate this by expanding a viral stock, isolating viral nucleocapsid DNA, preparing a library of genome fragments, and collecting high-throughput, paired-end sequence reads using an Illumina HiSeq or MiSeq instrument. In VirGA **Step 1**, host sequences and quality-reducing contaminants are removed. In **Step 2**, the viral sequences are assembled into long stretches of continuous sequence (contigs) by the use of two de novo assemblers, SSAKE and Celera. In **Step 3**, these long stretches of sequence are arranged in order by comparison to a reference genome. Gaps can be closed by using the GapFiller™ program to search for overlapping sequences in the input data. Annotations are transferred from the reference genome to the new draft genome at this stage. In **Step 4**, the original sequence reads are aligned to the draft consensus to check the assembly quality. Best practices in HSV genome assembly involve wet-bench validations of each assembly, such as PCR verification of key differences or RFLP analysis of genome orientation.

Parsons *et al.*, *mBio* (2015).

Rapid genome assembly and comparison decodes intra-strain variation in human alpha-herpesviruses
