# Supplementary material for: Rapid Genome Assembly and Comparison Decode Intrastrain Variation in Human Alphaherpesviruses
Source: PubMed Central journal article supplement — mBio. 2015 Mar 31;6(2):e02213-14. doi: 10.1128/mBio.02213-14 (PMC4453532; doi:10.1128/mbio.02213-14), 2015-03-31
Supplement: mbo002152248sf4.pdf [file mbo002152248sf4.pdf]

Supplemental Figure S4. Excerpts from a VirGA output summary.

## ====VirGA HSV-KOSLarge Report Summary====

|                                          |                                           |
|------------------------------------------|-------------------------------------------|
| Genome name                              | <a href="#">HSV-KOSlg.fa</a>              |
| Genome annotation                        | <a href="#">HSV-KOSlg.gff</a>             |
| Genome length (trimmed)                  | 135295 bp                                 |
| Genome name (with TRL/TRS)               | <a href="#">full-length HSV-KOSlg.fa</a>  |
| Genome annotation (with TRL/TRS)         | <a href="#">full-length HSV-KOSlg.gff</a> |
| Genome length (with TRL/TRS)             | 150147 bp                                 |
| Number of bases with >=100 depth support | 129239 (95.52%)                           |

|                                |                                    |
|--------------------------------|------------------------------------|
| Number of gaps                 | 4                                  |
| Number of Ns                   | 1081                               |
| Complete protein annotations   | 70                                 |
| Incomplete protein annotations | 4                                  |
| Reference name                 | <a href="#">HSV-17_trimmed.fa</a>  |
| Reference annotation           | <a href="#">HSV-17_trimmed.gff</a> |

### Coverage plot demonstrating read depth across the new genome

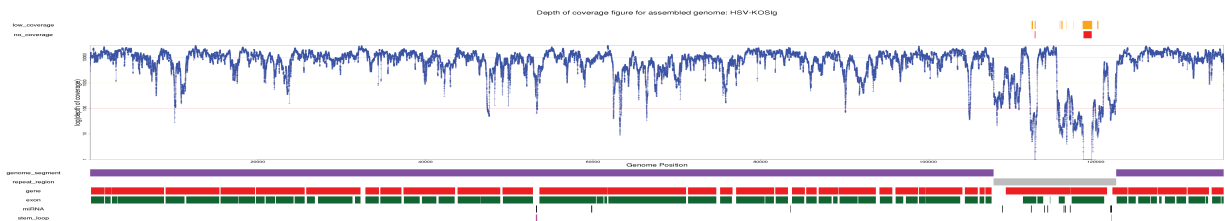

### The following proteins were correctly assembled and annotated from the HSV-KOSlg genome

gene\_RL1: [Gene|ORF|AA](#) No errors    gene\_UL1: [Gene|ORF|AA](#) No errors    gene\_UL2: [Gene|ORF|AA](#) No errors  
gene\_UL3: [Gene|ORF|AA](#) No errors    gene\_UL4: [Gene|ORF|AA](#) No errors    gene\_UL5: [Gene|ORF|AA](#) No errors  
gene\_UL6: [Gene|ORF|AA](#) No errors    gene\_UL7: [Gene|ORF|AA](#) No errors    gene\_UL8: [Gene|ORF|AA](#) No errors

### Proteins requiring review due to potential assembly defects or substantial biological variation:

gene\_RL2: [Gene|ORF|AA](#) (Gaps found)  
gene\_RS1: [Gene|ORF|AA](#) (Deviation of percent identity is >= 20%) (Gaps found)

### The following genome features are not proteins and were aligned to the reference for comparison

gene\_LAT: None    gene\_US12\_start\_in\_IRS: [DNA](#)    hsv1-mir-H1: [DNA](#)  
hsv1-mir-H2: [DNA](#)    hsv1-mir-H3: [DNA](#)    hsv1-mir-H4: [DNA](#)

## ====VirGA Detailed Report====

Procedure: 'after\_stats'

Purpose: Create histograms of raw read quality and other metrics

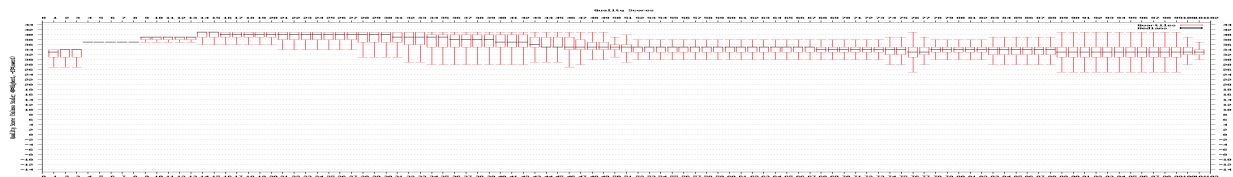

**Supplemental Figure S4. Example of a VirGA output summary.** As part of its output, VirGA generates an interactive html file for each draft genome assembly, which can be opened in any web browser. This file summarizes statistics about the assembly, and links to additional files. This image includes excerpted sections from a full VirGA output. Complete records of all VirGA outputs from this paper are archived at: <https://scholarsphere.psu.edu/collections/sf268c193>. The “VirGA Report Summary” includes statistics about the new draft genome, such as length, percent with coverage depth >100-fold, number of gaps, and number of intact (gap-free) proteins. Links are provided to alignments of each gene and protein vs. the reference genome; these are grouped into those without errors (green text) and those needing user attention (red text). Alignments for non-coding features are included as well. Below the summary, an extensive “VirGA detailed report” includes statistics on the number of sequence reads filtered out during the preprocessing steps, the number of contigs produced during SSAKE and Celera assembly, the gaps closed by GapFiller, and the results of quality assessment when the sequence reads are aligned to the new draft genome. From this extensive summary, only a histogram of sequence read quality per base is shown here.

Parsons *et al.*, *mBio* (2015).

Rapid genome assembly and comparison decodes intra-strain variation in human alpha-herpesviruses
