# Supplementary material for: Rapid Genome Assembly and Comparison Decode Intrastrain Variation in Human Alphaherpesviruses
Source: PubMed Central journal article supplement — mBio. 2015 Mar 31;6(2):e02213-14. doi: 10.1128/mBio.02213-14 (PMC4453532; doi:10.1128/mbio.02213-14), 2015-03-31
Supplement: mbo002152248sf5.pdf [file mbo002152248sf5.pdf]

**Supplemental Figure S5. Serial assemblies demonstrate how increasing amounts of input data produce improved viral genome assemblies.**

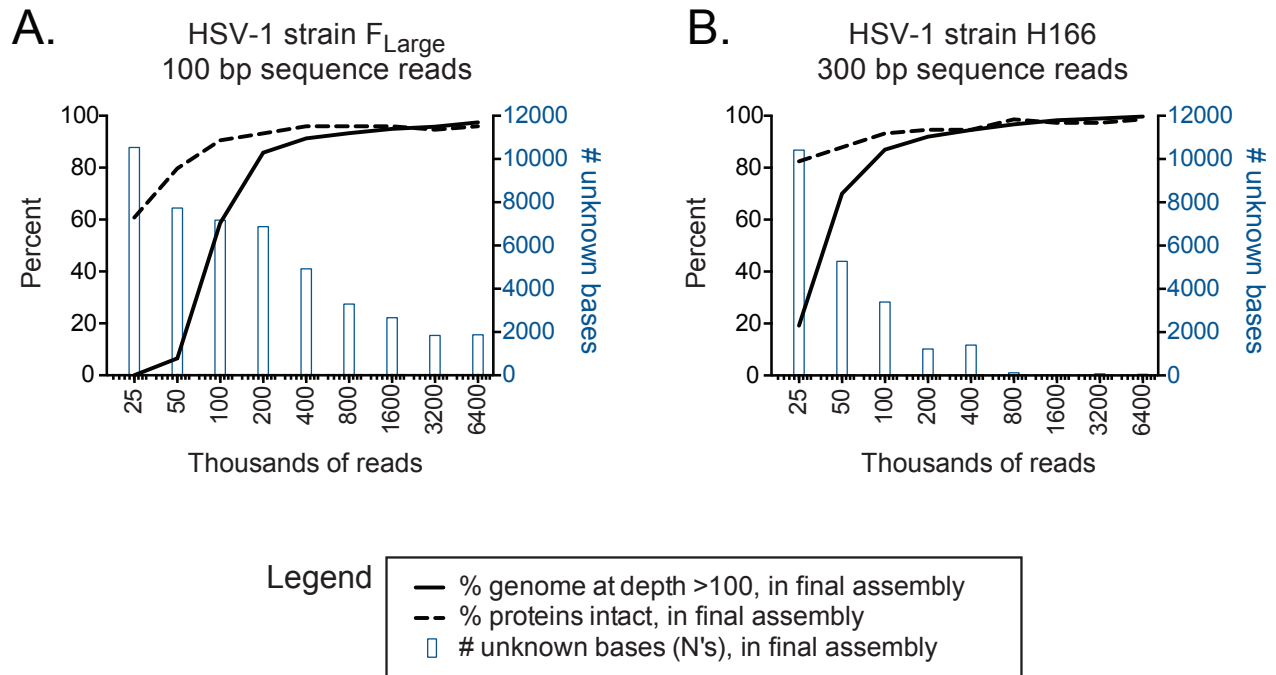

**Supplemental Figure S5. Serial assemblies demonstrate how increasing amounts of input data produce improved viral genome assemblies.** We used VirGA to generate serial assemblies of both 100 bp paired-end sequence reads (**A**) and 300 bp paired-end sequence reads (**B**), doubling the number of input reads each time (x-axis). For each assembly, we calculated the percent of the genome with sequencing coverage depth greater than or equal to 100-fold (solid line), the percent of proteins that were assembled intact (gap-free, dashed line), and counted the number of undetermined bases (“N”s in the final assembly, blue histograms). (**A**) For 100 bp, paired-end data, we observed that a minimum of 400,000 reads were needed to produce an HSV-1 assembly with 90% of the proteins intact. (**B**) For 300 bp, paired-end data, we observed that just 200,000 reads were needed to produce an HSV-1 assembly with 90% of the proteins intact. Results were verified with serial assemblies of data from HSV-1 F<sub>Syncytial</sub> and H166<sub>Syncytial</sub> as well (data not shown).
