# Supplementary material for: Rapid Genome Assembly and Comparison Decode Intrastrain Variation in Human Alphaherpesviruses
Source: PubMed Central journal article supplement — mBio. 2015 Mar 31;6(2):e02213-14. doi: 10.1128/mBio.02213-14 (PMC4453532; doi:10.1128/mbio.02213-14), 2015-03-31
Supplement: mbo002152248sf6.pdf [file mbo002152248sf6.pdf]

**Supplemental Figure S6. Genetic distance diagram, DNA identity, and protein difference statistics summarize relatedness of HSV-1 strains and sub-clones.**

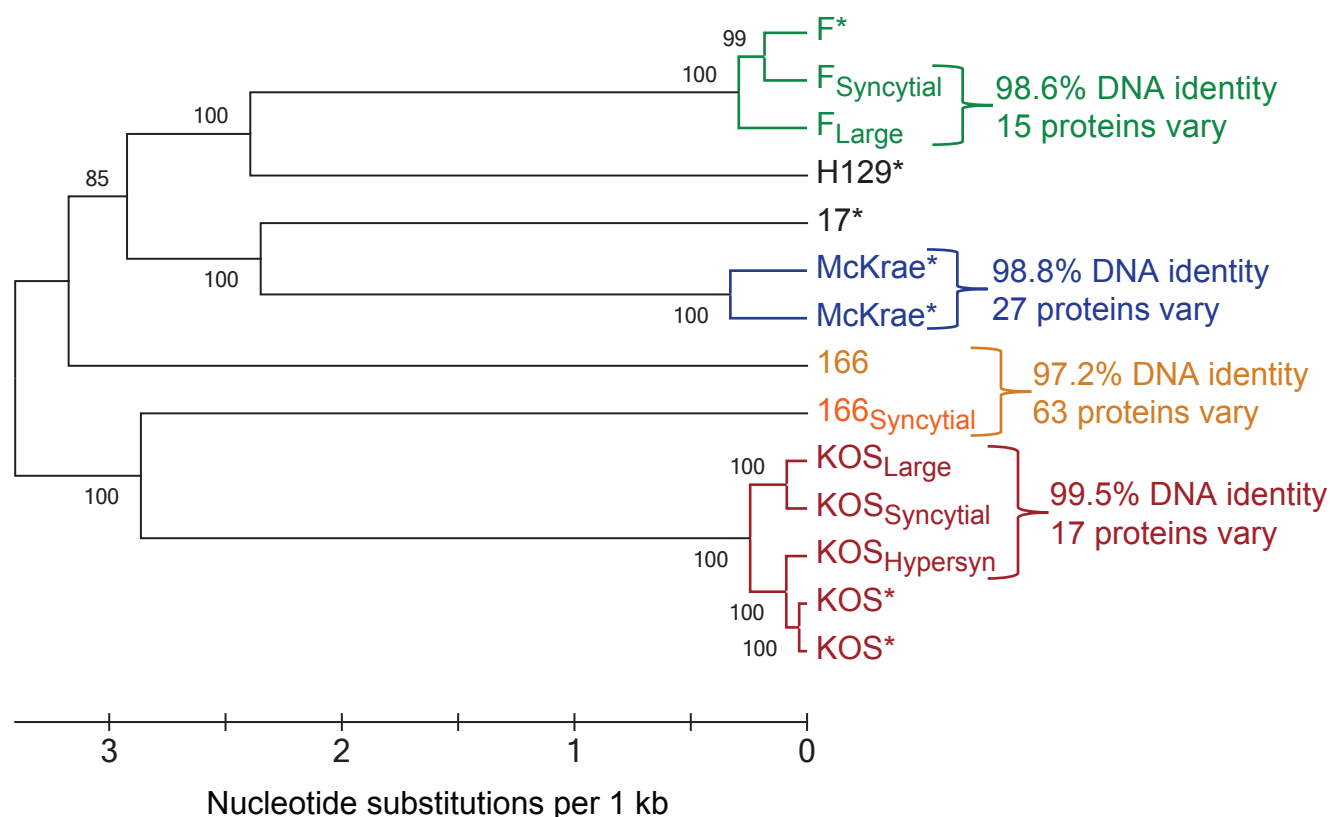

**Supplemental Figure S6. Genetic distance diagram, DNA identity, and protein difference**

**statistics summarize relatedness of HSV-1 strains and sub-clones.** We followed the same approach as used previously (Szpara et al., 2014, *J. Virol*, 88: 1209–27) to generate a genetic distance tree from whole-genome alignments of the strains and sub-clones shown (see Methods for details). Branch-points show confidence values. We calculated the percent DNA identity and number of variant proteins for selected sets of sequences; these are shown on the right. NCBI Accessions for strains not sequenced in this paper (marked \*) are as follows: H129, GU734772; 17, JN555585; McKrae, JQ730035 and JX142173; KOS, JQ780693 and JQ673480.
