# Supplementary material for: Rapid Genome Assembly and Comparison Decode Intrastrain Variation in Human Alphaherpesviruses
Source: PubMed Central journal article supplement — mBio. 2015 Mar 31;6(2):e02213-14. doi: 10.1128/mBio.02213-14 (PMC4453532; doi:10.1128/mbio.02213-14), 2015-03-31
Supplement: mbo002152248st1.pdf [file mbo002152248st1.pdf]

**Supplemental Table S1. List of proteins that vary between strains.**

| <b>Comparison</b>                                                                         | <b># proteins</b> | <b>List of proteins that vary between strains</b>                                                                                                                                                                                                                                                                                                                       |
|-------------------------------------------------------------------------------------------|-------------------|-------------------------------------------------------------------------------------------------------------------------------------------------------------------------------------------------------------------------------------------------------------------------------------------------------------------------------------------------------------------------|
| KOS <sub>Large</sub> vs.<br>KOS <sub>Syncytial</sub> vs.<br>KOS <sub>Hypersyncytial</sub> | 17                | RL2, RS1, UL5, UL7, UL8, UL9, UL13, UL19, UL21, UL22, UL23, UL27, UL29, UL36, UL52, US8A, US10                                                                                                                                                                                                                                                                          |
| F <sub>Large</sub> vs.<br>F <sub>Syncytial</sub>                                          | 15                | RL1, RL2, RS1, UL9, UL10, UL27, UL29, UL35, UL36, UL37, UL38, UL39, UL44, US3, US11                                                                                                                                                                                                                                                                                     |
| H166 vs.<br>H166 <sub>Syncytial</sub>                                                     | 63                | RL1, RL2, RS1, UL1, UL2, UL5, UL6, UL8, UL9, UL10, UL11, UL12, UL13, UL14, UL15, UL16, UL17, UL18, UL19, UL20, UL21, UL22, UL23, UL24, UL25, UL26, UL26.5, UL27, UL29, UL30, UL32, UL34, UL36, UL37, UL38, UL39, UL3, UL40, UL41, UL42, UL43, UL44, UL46, UL47, UL48, UL49, UL51, UL52, UL53, UL56, US1, US2, US3, US4, US5, US6, US7, US8, US8A, US9, US10, US11, US12 |
| McKrae<br>(JX142173 &<br>JQ730035)*                                                       | 27                | RL1, RS1, RL2, UL3, UL5, UL6, UL7, UL17, UL23, UL25, UL29, UL30, UL32, UL36, UL37, UL38, UL42, UL50, UL54, UL55, UL56, US8, US3, US2, US7, US10, US11                                                                                                                                                                                                                   |

\* Data drawn from references (1, 2).

**References**

1. **Watson G, Xu W, Reed a, Babra B, Putman T, Wick E, Wechsler SL, Rohrmann GF, Jin L.** 2012. Sequence and comparative analysis of the genome of HSV-1 strain McKrae. *Virology* **433**:528–37.
2. **Macdonald SJ, Mostafa HH, Morrison L a, Davido DJ.** 2012. Genome sequence of herpes simplex virus 1 strain McKrae. *J. Virol.* **86**:9540–9541.
