# Supplementary material for: Rapid Genome Assembly and Comparison Decode Intrastrain Variation in Human Alphaherpesviruses
Source: PubMed Central journal article supplement — mBio. 2015 Mar 31;6(2):e02213-14. doi: 10.1128/mBio.02213-14 (PMC4453532; doi:10.1128/mbio.02213-14), 2015-03-31
Supplement: mbo002152248st2.pdf [file mbo002152248st2.pdf]

**Supplemental Table S2. Primers for PCR validations.**

| Primer Name | Gene of Interest | Sequence                     |
|-------------|------------------|------------------------------|
| F1_PCR_UL11 | UL11             | 5'-CGACGTATTGTACGCCAAGATA-3' |
| R1_PCR_UL11 | UL11             | 5'-CCGATCGCCCTGATCATTAC-3'   |
| F2_SEQ_UL11 | UL11             | 5'-TTATTTCGCTATCGGACATGGG-3' |
| R2_SEQ_UL11 | UL11             | 5'-CCGAAACAACGTCCTCATCA-3'   |
| F1_PCR_UL27 | UL27             | 5'-ACCTTCATCGACCTCAACATC-3'  |
| R1_PCR_UL27 | UL27             | 5'-ATGCGGTTTAACACCCGTGG-3'   |
| F2_SEQ_UL27 | UL27             | 5'-TGTCCCTCCTTCATGTCCAAC-3'  |
| R2_SEQ_UL27 | UL27             | 5'-GTTGGGAACCTTGGGTGTAGT-3'  |
| F1_PCR_UL43 | UL43             | 5'-GATGACGTCTATCCGCTCTTTC-3' |
| R1_PCR_UL43 | UL43             | 5'-GTCTTCGGGACTAATGCCTTT-3'  |
| F2_SEQ_UL43 | UL43             | 5'-TCTATCCGCTCTTTCCTCG-3'    |
| R2_SEQ_UL43 | UL43             | 5'-GCGTACACGGAGAAGAAGAG-3'   |
| F1_PCR_US5  | US5              | 5'-CGCGGAAAGCAAGAACAATAA-3'  |
| R1_PCR_US5  | US5              | 5'-TTCGCGCTGAAGCTTATGA-3'    |
| F2_SEQ_US5  | US5              | 5'-TATCCGGAGAACAGCACAC-3'    |
| R2_SEQ_US5  | US5              | 5'-GGTCCATGTAGGGATGGTAAC-3'  |
